# Supplementary material for: Ginsenoside Rc, an Active Component of Panax ginseng, Alleviates Oxidative Stress-Induced Muscle Atrophy via Improvement of Mitochondrial Biogenesis
Source: MDPI journal article supplement (doi:10.3390/antiox12081576), 2023-08-07
Supplement: s1 [file s1]

Supplementary Materials for

**Ginsenoside Rc, an active component of *Panax ginseng*, alleviates  
oxidative stress-induced muscle atrophy via improvement of  
mitochondrial biogenesis**

Aeyung Kim, Sang-Min Park, No Soo Kim, and Haeseung Lee

\*Corresponding Author: Aeyung Kim (aykim71@kiom.re.kr), Haeseung Lee (haeseung@pusan.ac.kr)

This PDF file includes: Figure S1

## Figure S1

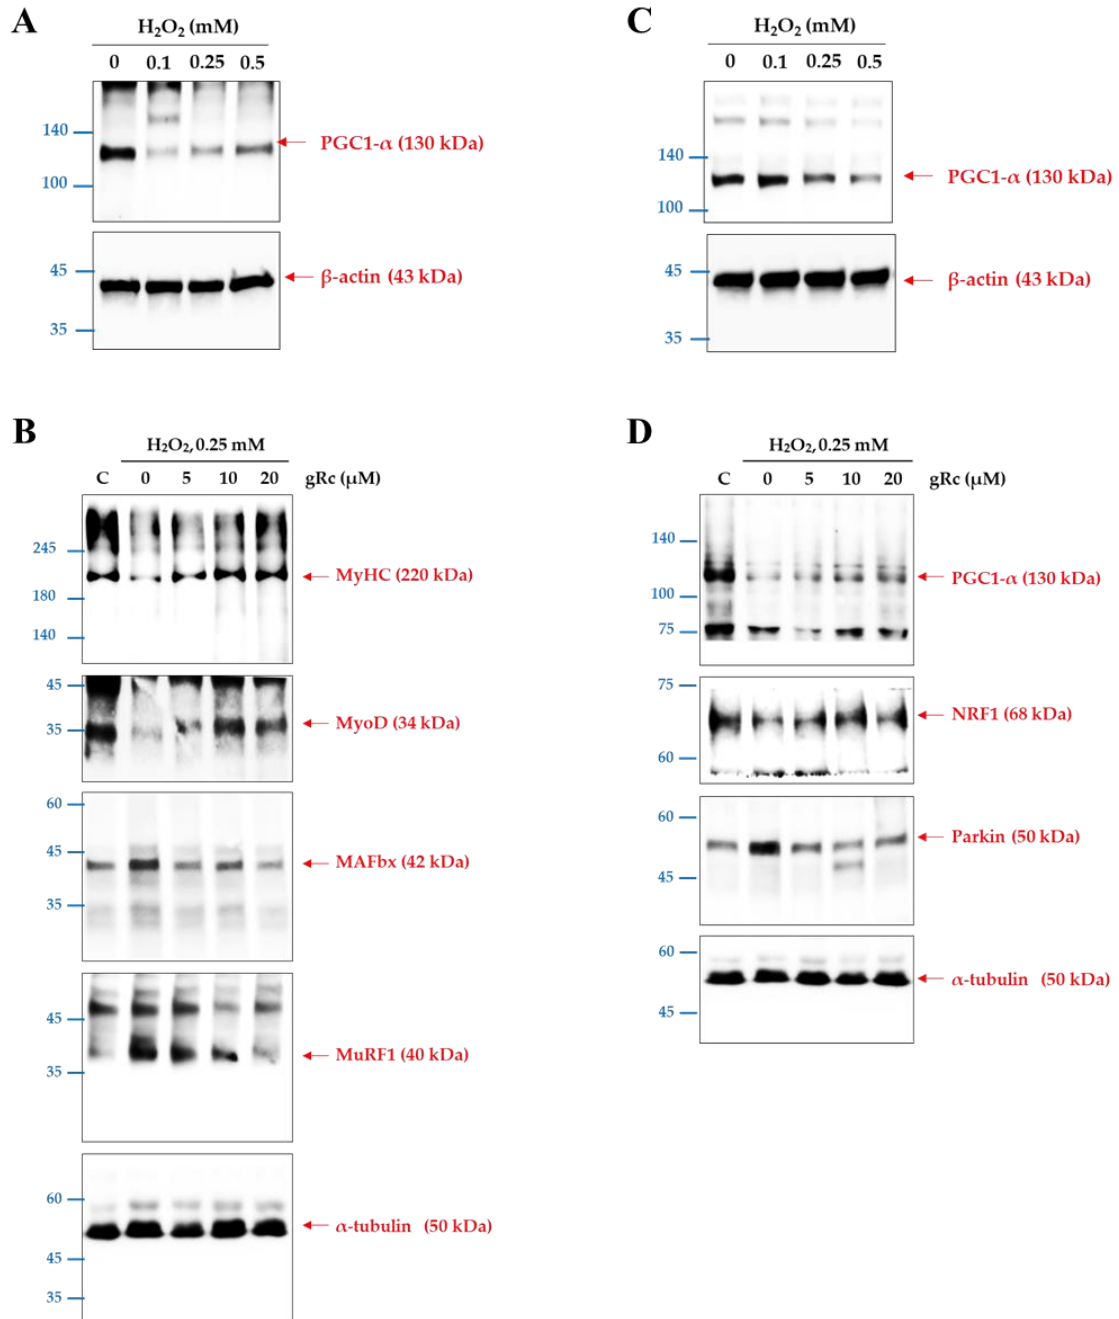

**Figure S1.** Uncropped western blot images corresponding to Figure 2A (A), Figure 3E (B), Figure 4A (C), and Figure 4C (D).
